# Supplementary figures and images for: Genome-wide study of correlations between genomic features and their relationship with the regulation of gene expression
Source: PubMed Central journal article supplement — DNA Res. 2015 Jan 27;22(1):109–19. doi: 10.1093/dnares/dsu044 (PMC4379982; doi:10.1093/dnares/dsu044), 2015-01-27

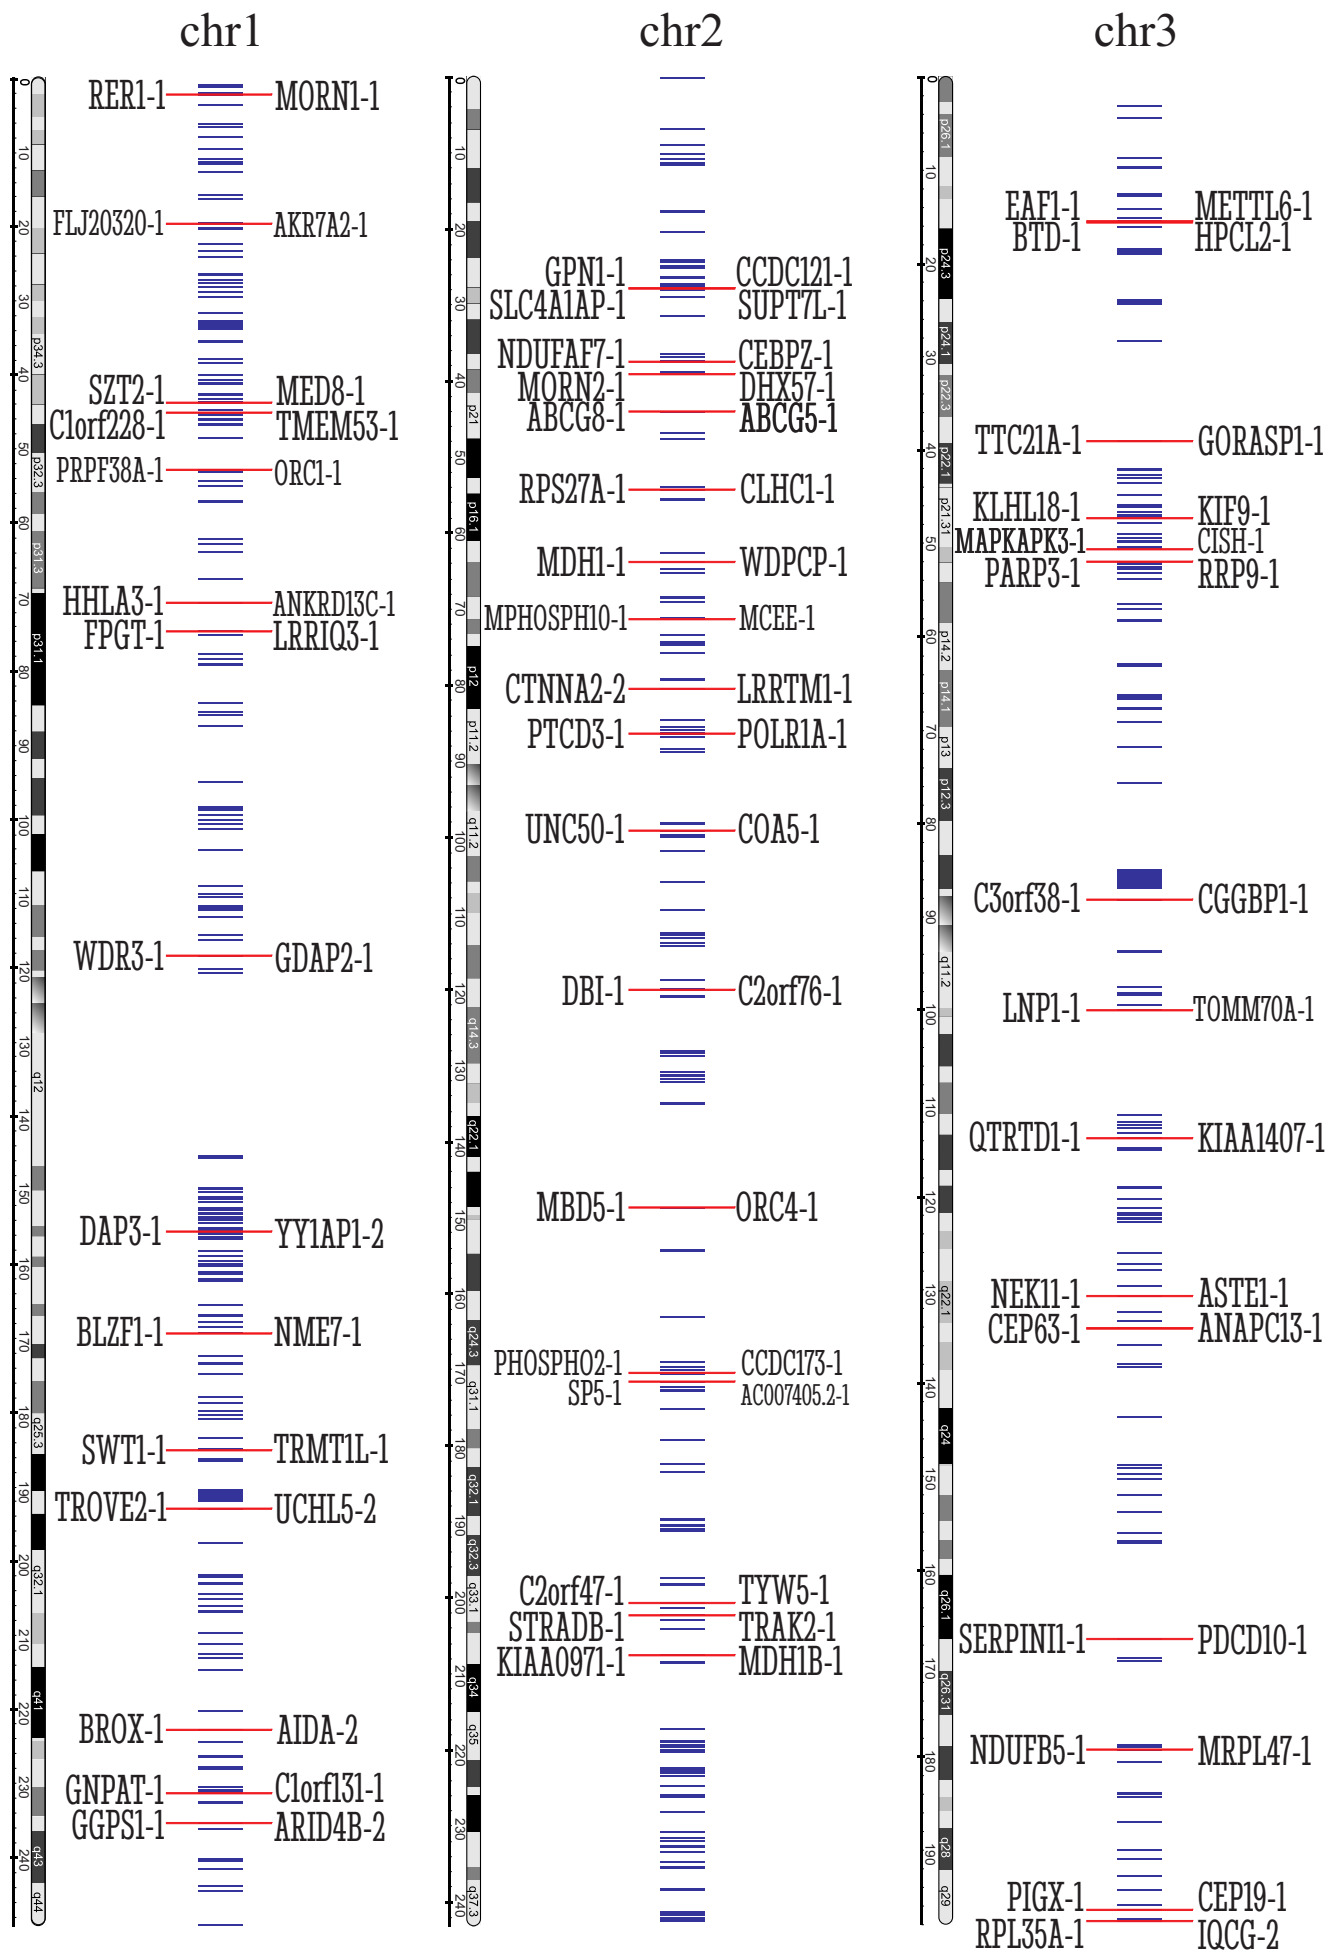

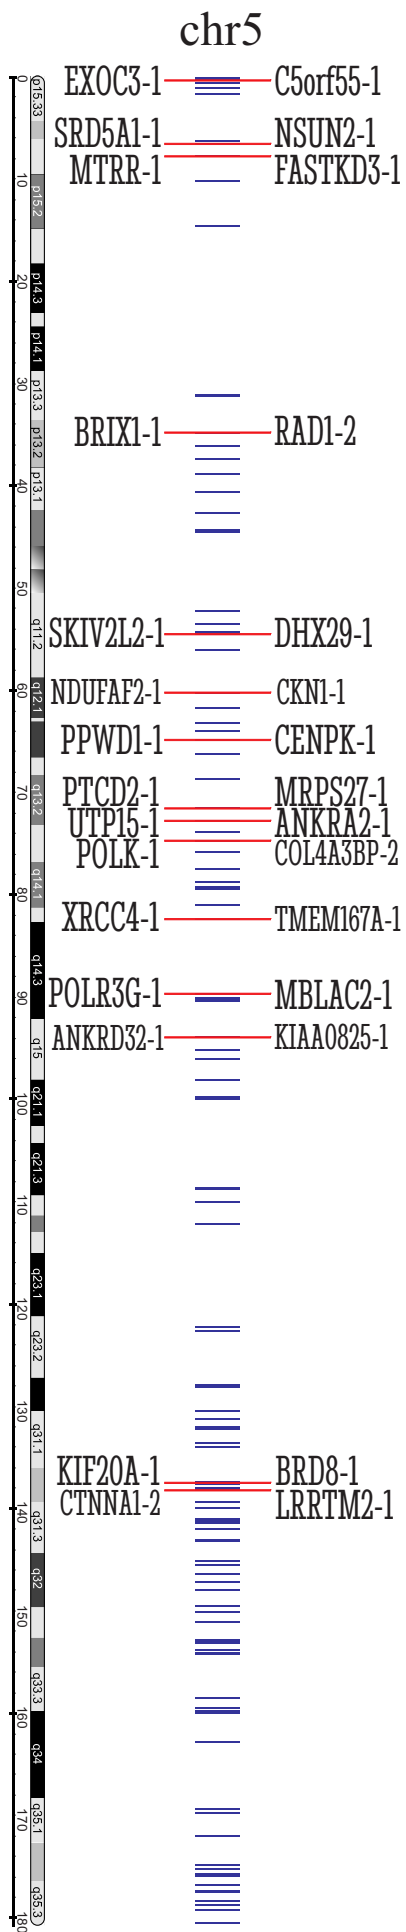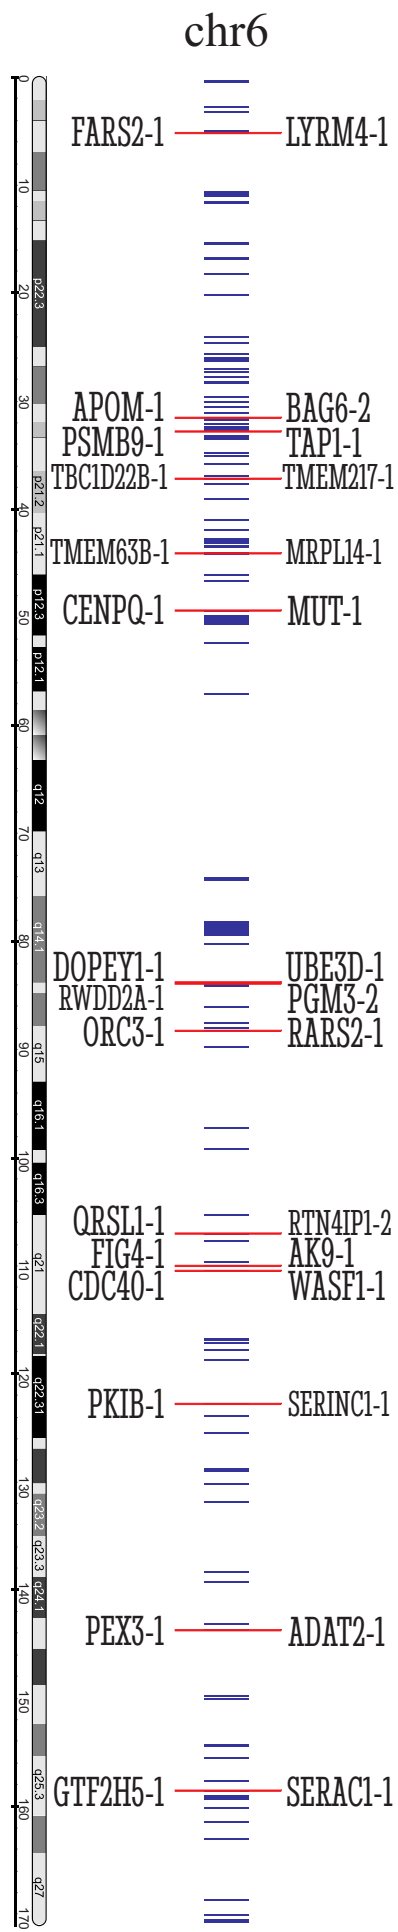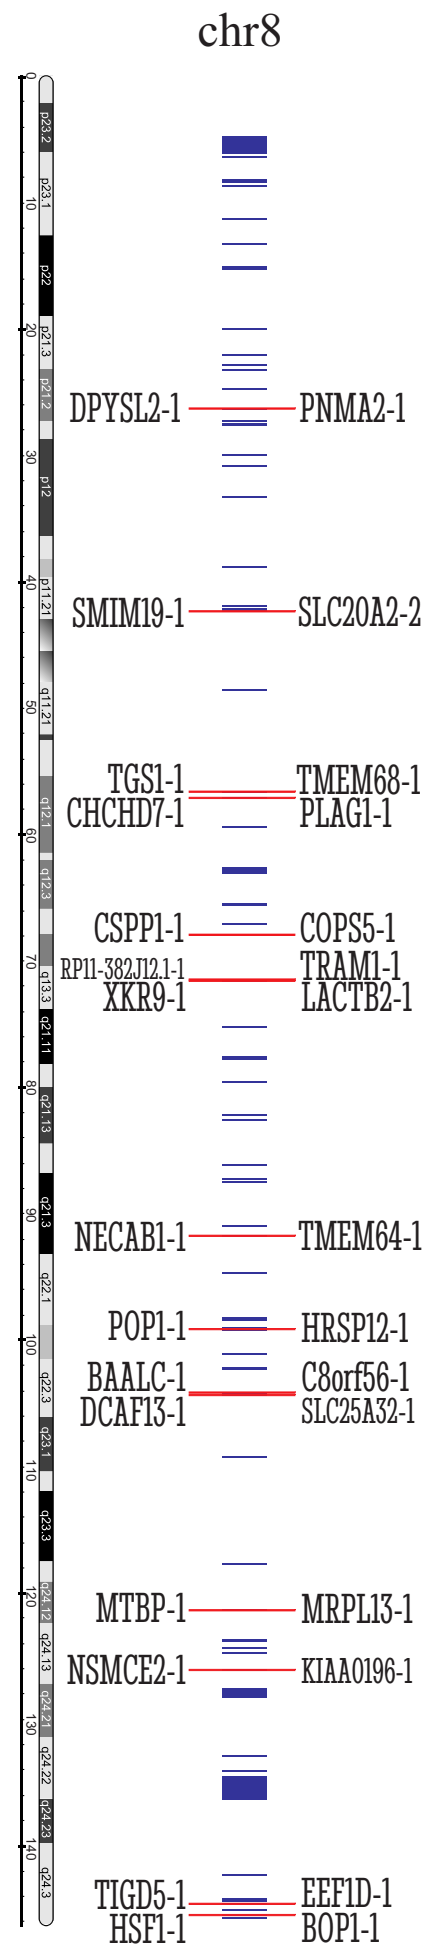

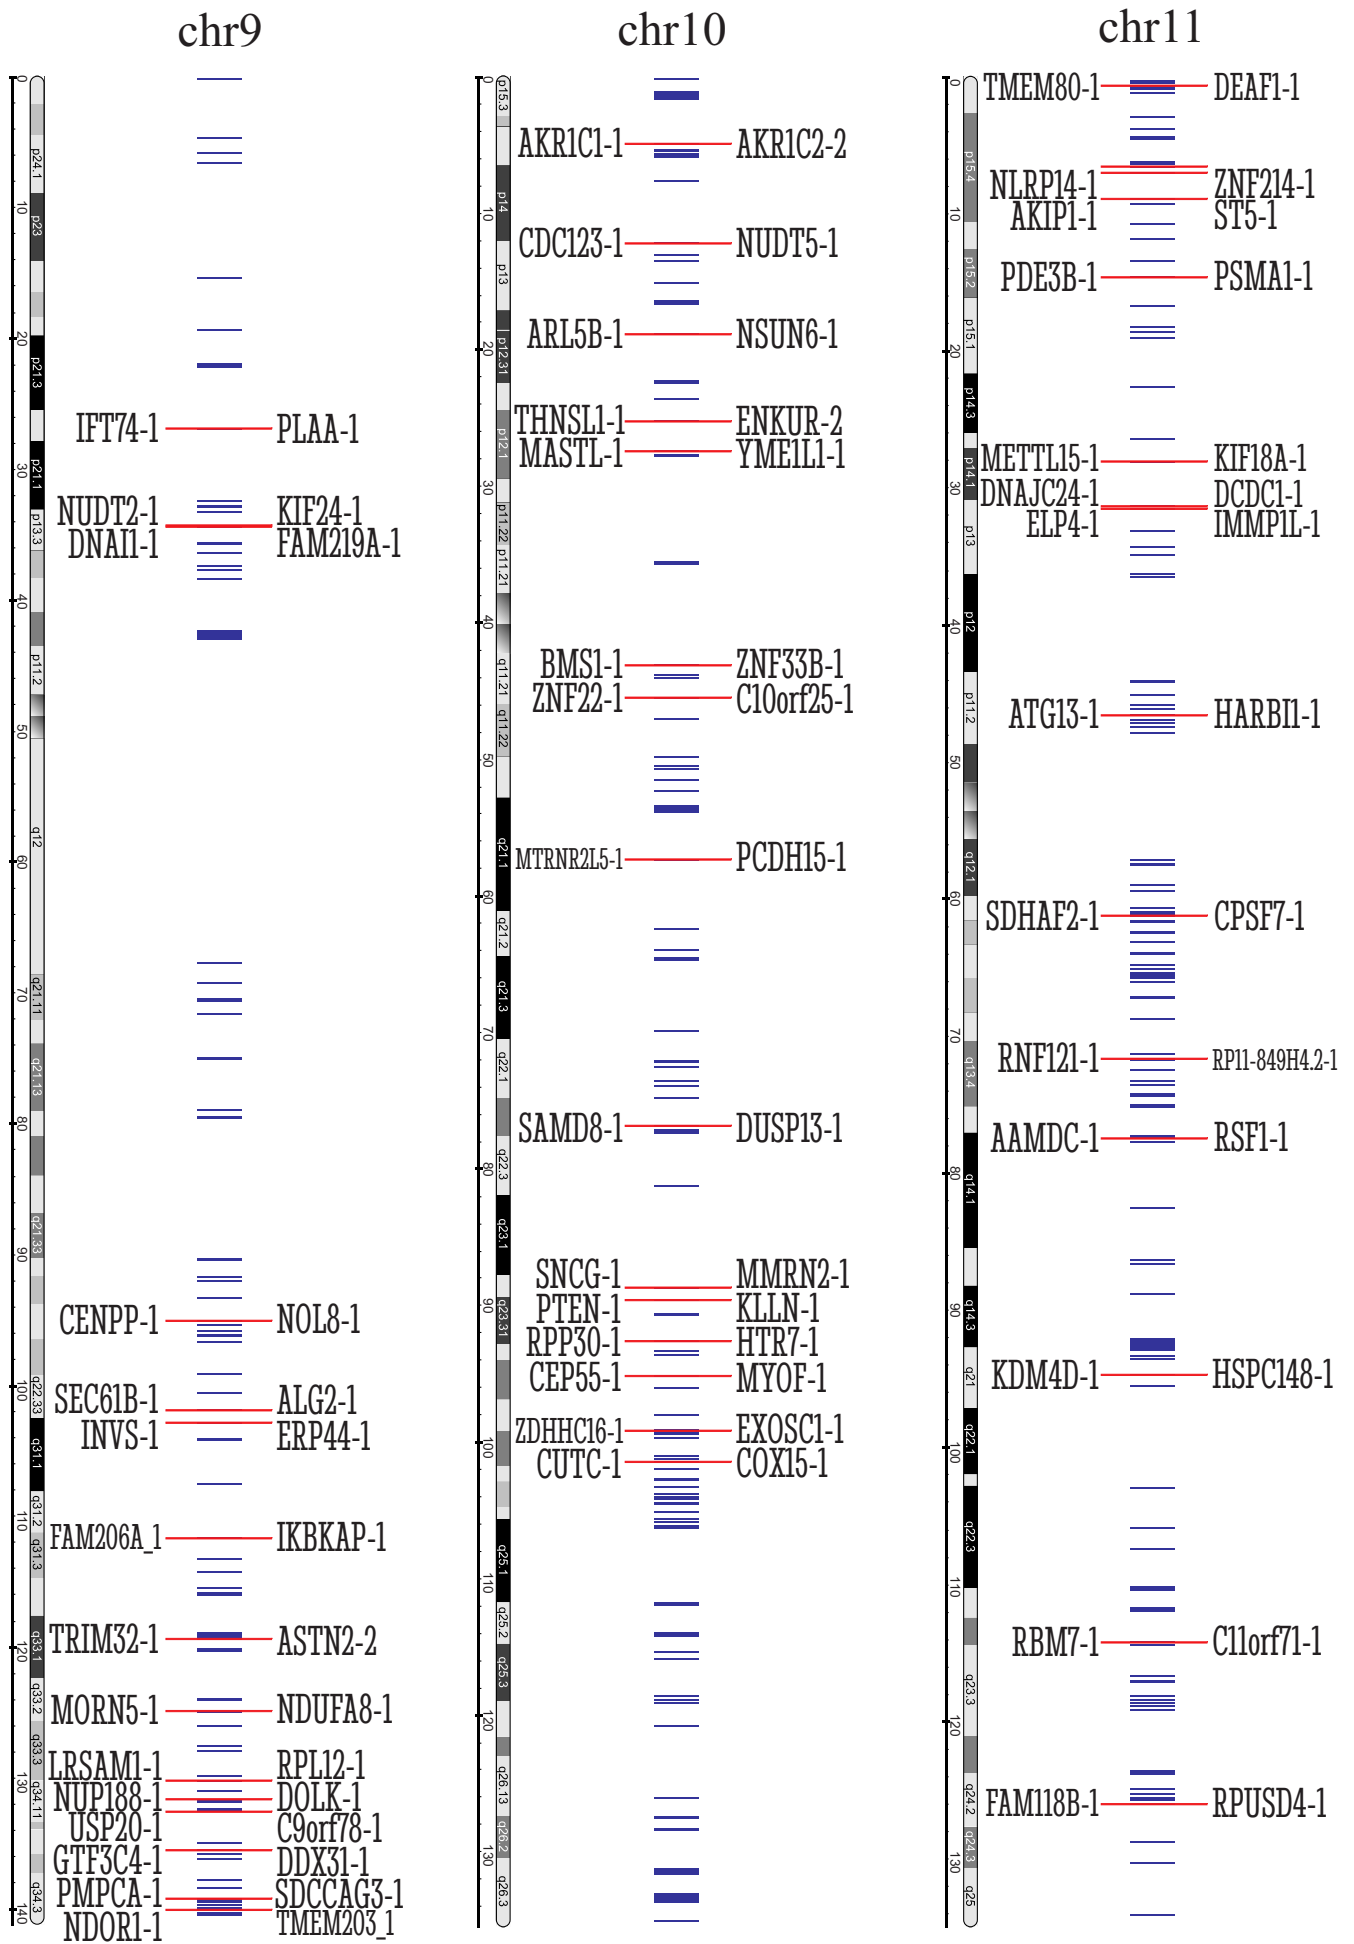

chr12

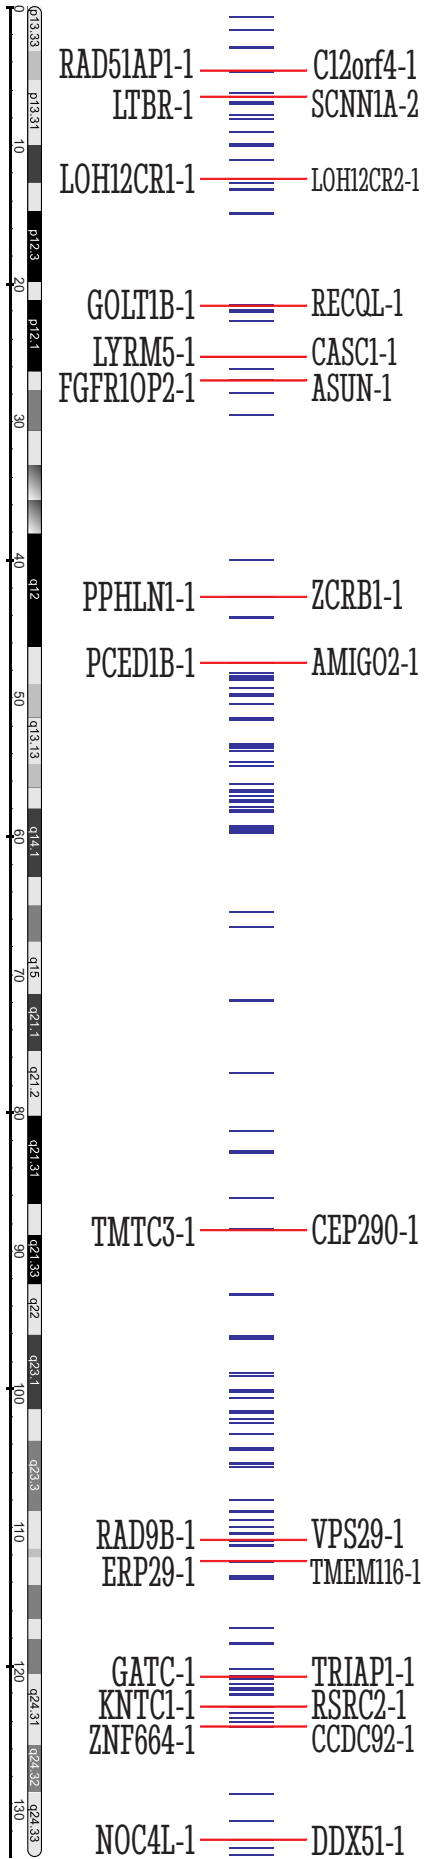

chr14

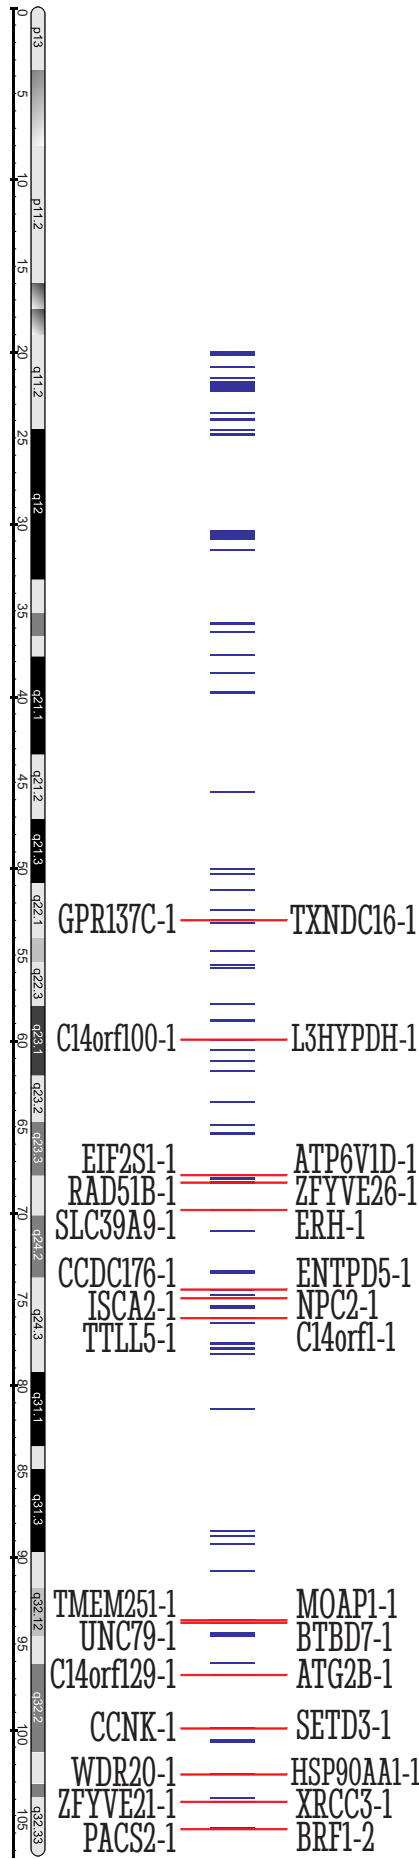

chr16

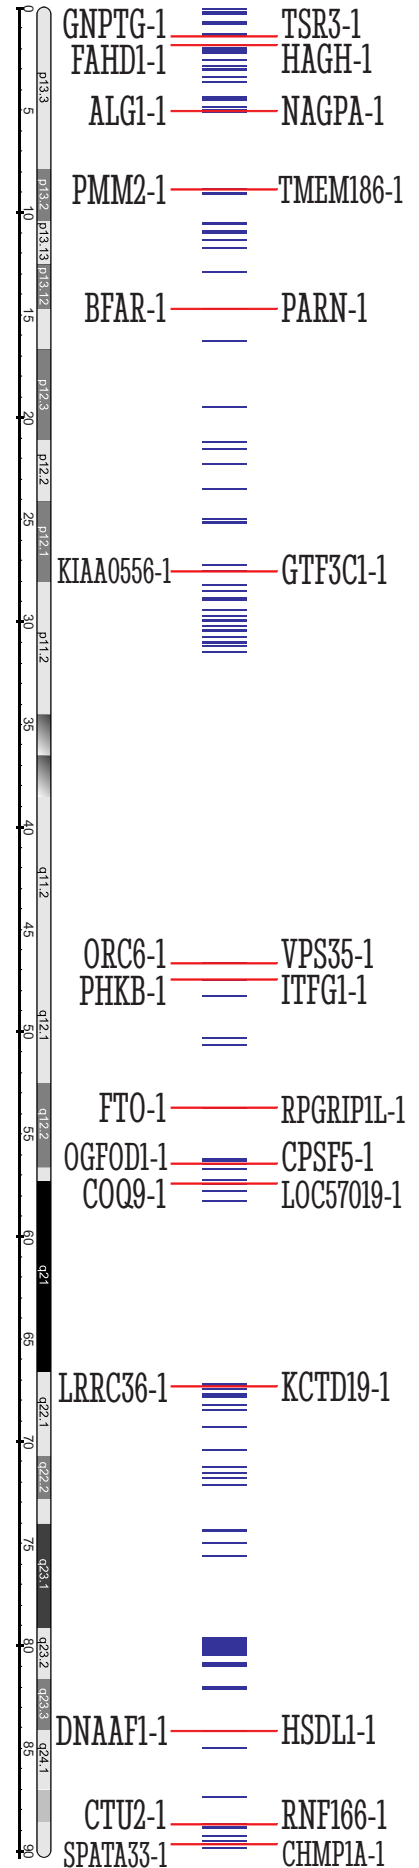

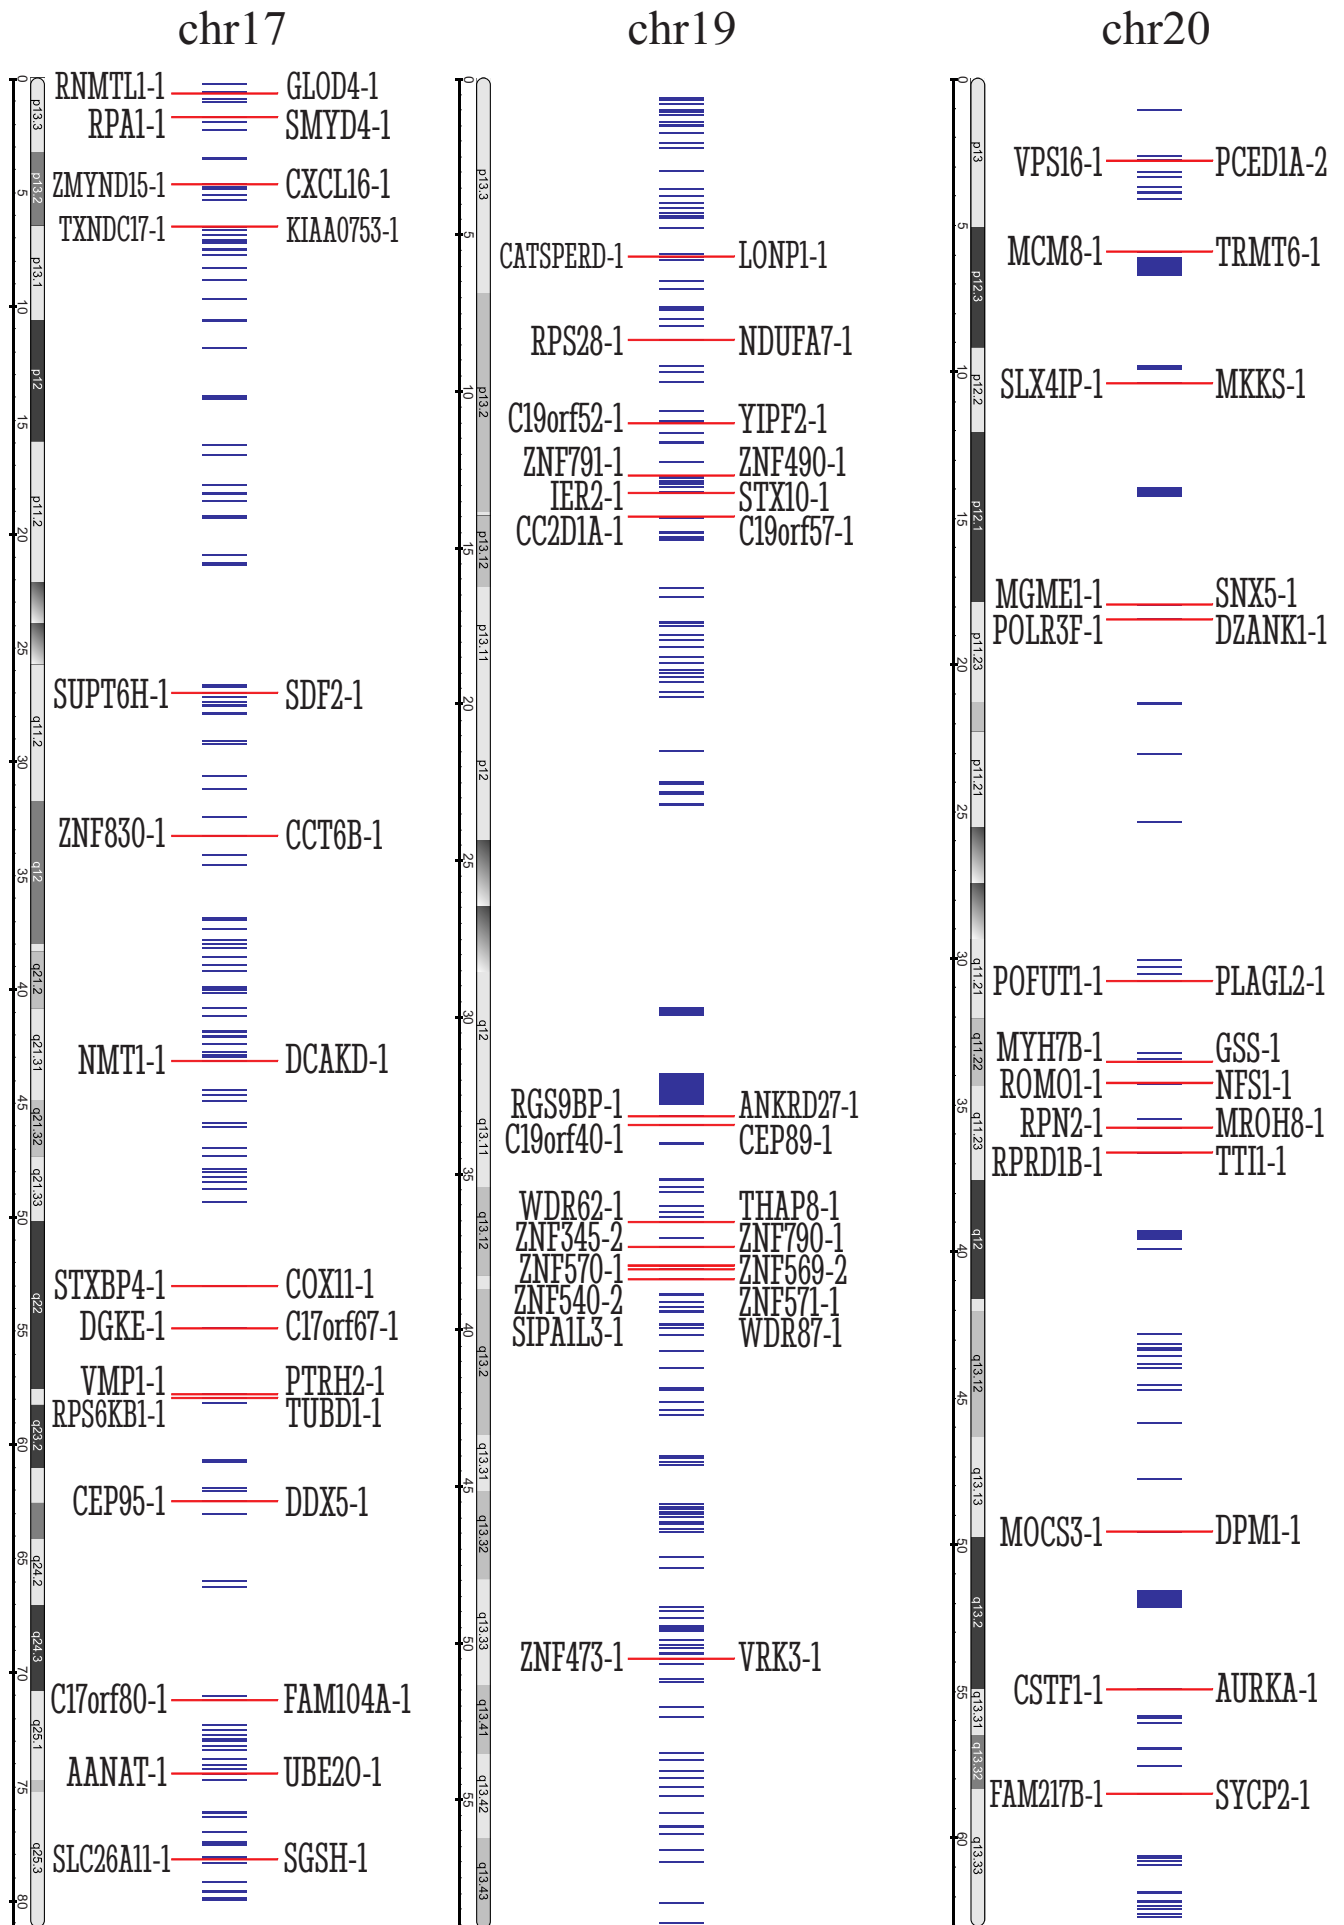

# chrX

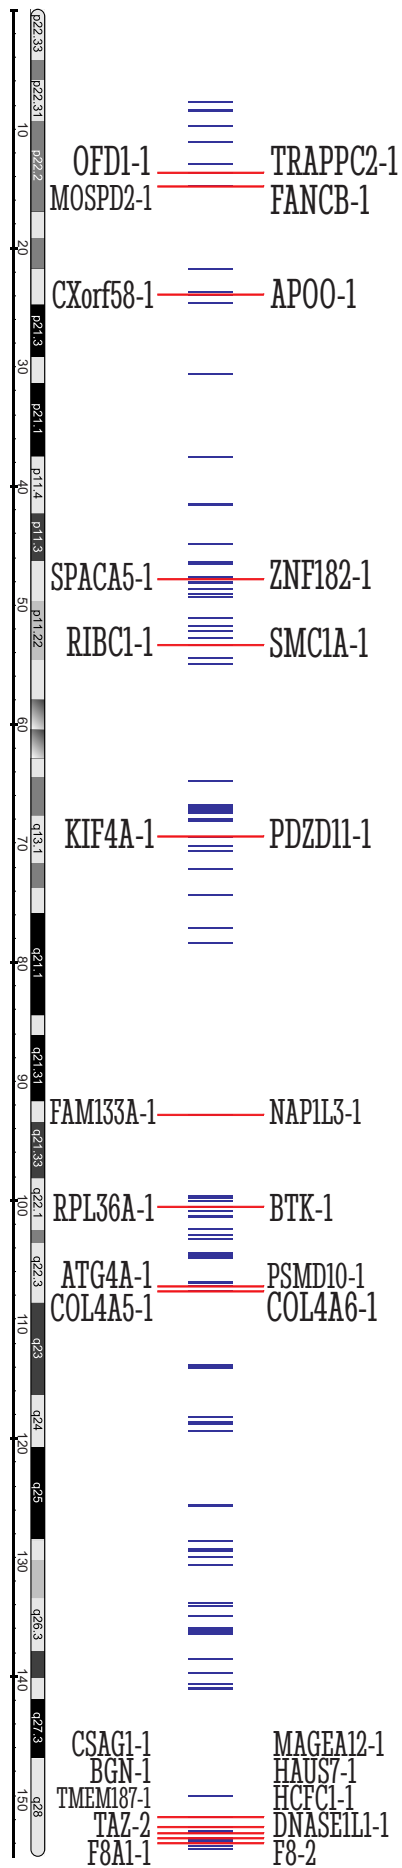

Supplement: supp_dsu044_dsu044supp_data4.pdf [file supp_dsu044_dsu044supp_data4.pdf]
